# Supplementary material
Source: Springer Nature journal article supplement (https://www.springermedizin.de/resource/supplementary/13058_2011_2841_MOESM6_ESM.pdf/9702684)
Supplement: MOESM6 [file 9702684]

Finding cohort-A (n=394 TNBC)

Validation cohort-B (n=185 TNBC)

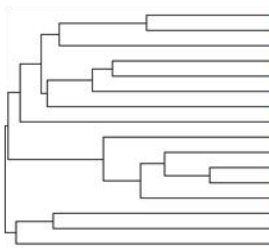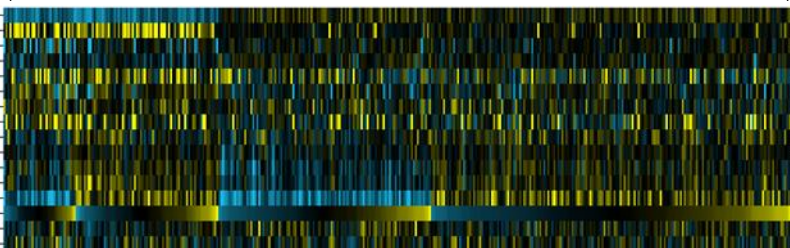

Basal  
Apocrine  
CLDN3  
Prolif  
Adipocyte  
Stroma  
HOX  
Hemoglobin  
IFN  
MHC1  
MHC2  
T-Cell  
B-Cell  
IL8  
VEGF  
Histone

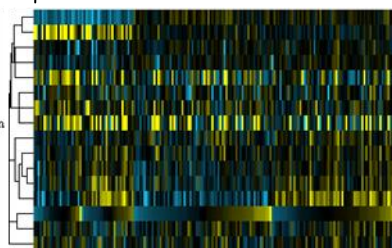

Basal  
Apocrine  
CLDN3  
Prolif  
Adipocyte  
Stroma  
HOX  
Hemoglobin  
IFN  
MHC1  
MHC2  
T-Cell  
B-Cell  
IL8  
VEGF  
Histone

Metagene  
expression  
values

355 Affymetrix probesets  
representing 16 metagenes

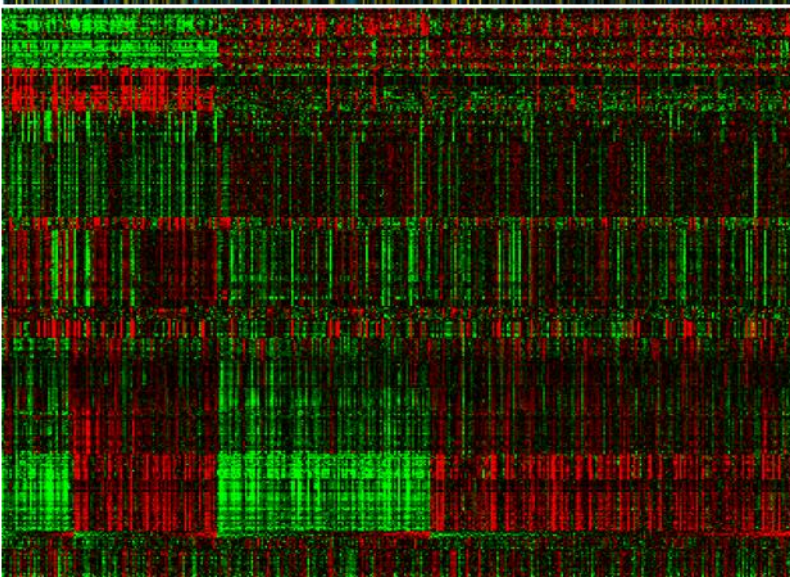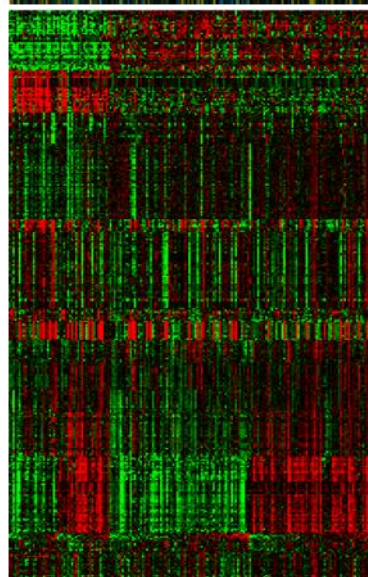

Basal-like  
Apocrine  
Claudin-CD24  
Proliferation  
Adipocyte  
Stroma  
HOXA  
Hemoglobin  
IFN  
MHC-1  
MHC-2  
T-Cell  
B-Cell  
IL-8  
VEGF  
Histone
